# Supplementary material
Source: publisher figshare collection journal article supplement (https://frontiersin.figshare.com/ndownloader/files/36388146)
Supplement: Supplementary file 1 [file 36388146]

Supplementary Material

Table S1. Dataset S1. “-” indicates that no data were collected because of mechanical constraints. Data shown in Kanna et al. (2018) was indicated as bold.

| Station | Date | Time (UTC) | Tide (m) | Longitude | Latitude | Depth (m) | Temperature (°C) | Salinity | δ18O (‰) | chl.a (µg L-1) | DIC (µmol kg-1) | TA (µmol kg-1) |
| --- | --- | --- | --- | --- | --- | --- | --- | --- | --- | --- | --- | --- |
| **BFD-2** | **29-Jul-16** | 17:26 | -1.34 | **-68.647** | **77.655** | **0** | **5.33** | **18.4** | - | - | **1164.9** | 1278.0 |
| **BFD-3** | **29-Jul-16** | 16:23 | -1.17 | **-68.637** | **77.640** | **0** | **5.35** | **17.2** | - | - | **1097.7** | 1227.7 |
| **BFD-4** | **29-Jul-16** | 14:53 | -0.88 | **-68.522** | **77.587** | **0** | **6.01** | **16.5** | - | - | **1074.0** | 1220.9 |
| **BFD-5** | **29-Jul-16** | 14:16 | -0.54 | **-68.436** | **77.532** | **0** | **5.78** | **17.9** | - | - | **1152.0** | 1270.2 |
| **BFS-1** | **27-Jul-16** | 14:14 | -1.24 | **-68.605** | **77.671** | **0** | **5.01** | **14.2** | - | - | **950.4** | 996.8 |
| **BFS-2** | **27-Jul-16** | 14:19 | -1.24 | **-68.614** | **77.675** | **0** | **5.21** | **12.8** | - | - | **868.5** | 915.0 |
| **BFS-3** | **27-Jul-16** | 14:28 | -1.24 | **-68.643** | **77.682** | **0** | **5.19** | **9.2** | - | - | **688.7** | 733.2 |
| **BFS-4** | **27-Jul-16** | 14:33 | -1.42 | **-68.659** | **77.686** | **0** | **5.32** | **7.9** | - | - | **628.6** | 649.6 |
| **BFS-5** | **27-Jul-16** | 14:38 | -1.42 | **-68.670** | **77.687** | **0** | **5.27** | **9.8** | - | - | **720.6** | 759.7 |
| **BFS-6** | **27-Jul-16** | 14:42 | -1.42 | **-68.661** | **77.683** | **0** | **5.19** | **9.4** | - | - | **703.9** | 737.8 |
| **BFS-7** | **27-Jul-16** | 14;47 | -1.42 | **-68.647** | **77.679** | **0** | **4.95** | **10.2** | - | - | **738.5** | 766.5 |
| **BFS-8** | **27-Jul-16** | 14:52 | -1.42 | **-68.632** | **77.675** | **0** | **4.96** | **12.5** | - | - | **852.6** | 895.8 |
| **BFS-9** | **27-Jul-16** | 14:57 | -1.42 | **-68.617** | **77.671** | **0** | **5.17** | **13.9** | - | - | **917.7** | 968.1 |
| **BFS-10** | **27-Jul-16** | 15:03 | -1.42 | **-68.602** | **77.668** | **0** | **5.44** | **15.3** | - | - | **989.7** | 1055.9 |
| **BFS-11** | **27-Jul-16** | 15:08 | -1.42 | **-68.608** | **77.667** | **0** | **5.33** | **15.0** | - | - | **980.7** | 1042.5 |
| **BFS-12** | **27-Jul-16** | 15:13 | -1.42 | **-68.622** | **77.670** | **0** | **5.11** | **14.3** | - | - | **948.0** | 999.5 |
| **BFS-13** | **27-Jul-16** | 15:18 | -1.42 | **-68.638** | **77.673** | **0** | **5.06** | **14.1** | - | - | **930.3** | 988.8 |
| **BFS-14** | **27-Jul-16** | 15:23 | -1.42 | **-68.651** | **77.676** | **0** | **5.18** | **10.9** | - | - | **774.8** | 808.2 |
| **BFS-15** | **27-Jul-16** | 15:27 | -1.42 | **-68.665** | **77.679** | **0** | **4.98** | **12.0** | - | - | **824.5** | 863.0 |
| **BFS-16** | **27-Jul-16** | 15:33 | -1.37 | **-68.681** | **77.682** | **0** | **5.17** | **13.9** | - | - | **925.3** | 976.6 |
| **BFS-17** | **27-Jul-16** | 15:38 | -1.37 | **-68.673** | **77.678** | **0** | **5.07** | **13.8** | - | - | **913.1** | 971.8 |
| **BFS-18** | **27-Jul-16** | 15:48 | -1.37 | **-68.666** | **77.672** | **0** | **4.72** | **13.4** | - | - | **888.2** | 939.4 |
| **BFS-19** | **27-Jul-16** | 15:53 | -1.37 | **-68.645** | **77.670** | **0** | **4.98** | **14.0** | - | - | **925.6** | 976.2 |
| **BFS-20** | **27-Jul-16** | 16:13 | -1.37 | **-68.635** | **77.660** | **0** | **5.17** | **15.4** | - | - | **1003.3** | 1072.1 |
| **BFS-21** | **27-Jul-16** | 16:18 | -1.37 | **-68.641** | **77.656** | **0** | **4.76** | **17.1** | - | - | **1098.1** | 1196.8 |
| **BFS-22** | **27-Jul-16** | 16:23 | -1.37 | **-68.636** | **77.651** | **0** | **4.72** | **18.9** | - | - | **1195.0** | 1310.9 |
| **BFS-23** | **27-Jul-16** | 16:28 | -1.37 | **-68.631** | **77.647** | **0** | **4.68** | **18.5** | - | - | **1172.9** | 1282.3 |
| **BFS-24** | **27-Jul-16** | 16:33 | -1.16 | **-68.628** | **77.643** | **0** | **4.80** | **18.2** | - | - | **1148.0** | 1264.2 |
| **BFS-25** | **27-Jul-16** | 16:38 | -1.16 | **-68.622** | **77.639** | **0** | **4.91** | **18.4** | - | - | **1163.7** | 1279.8 |
| **BFS-26** | **27-Jul-16** | 16:43 | -1.16 | **-68.616** | **77.635** | **0** | **4.89** | **18.5** | - | - | **1175.0** | 1288.2 |
| **BFS-27** | **27-Jul-16** | 16:49 | -1.16 | **-68.607** | **77.630** | **0** | **4.88** | **19.6** | - | - | **1235.1** | 1355.0 |
| **BFS-28** | **27-Jul-16** | 16:54 | -1.16 | **-68.601** | **77.626** | **0** | **4.62** | **20.4** | - | - | **1277.2** | 1413.8 |
| **BFS-29** | **27-Jul-16** | 16:58 | -1.16 | **-68.594** | **77.622** | **0** | **4.53** | **20.7** | - | - | **1295.0** | 1423.7 |
| **BFS-30** | **27-Jul-16** | 17:03 | -1.16 | **-68.588** | **77.617** | **0** | **4.47** | **20.7** | - | - | **1298.2** | 1435.1 |
| **BFS-31** | **27-Jul-16** | 17:08 | -1.16 | **-68.582** | **77.613** | **0** | **4.42** | **21.3** | - | - | **1323.3** | 1461.3 |
| **BFS-32** | **27-Jul-16** | 17:13 | -1.16 | **-68.574** | **77.609** | **0** | **4.25** | **21.3** | - | - | **1326.7** | 1474.8 |
| **BFS-33** | **27-Jul-16** | 17:37 | -0.79 | **-68.561** | **77.600** | **0** | **4.36** | **20.8** | - | - | **1304.0** | 1428.2 |
| **BFS-34** | **27-Jul-16** | 17:42 | -0.79 | **-68.551** | **77.595** | **0** | **4.27** | **20.3** | - | - | **1272.6** | 1396.5 |
| **BFS-35** | **27-Jul-16** | 17:48 | -0.79 | **-68.543** | **77.590** | **0** | **4.19** | **20.7** | - | - | **1292.9** | 1425.2 |
| **BFS-36** | **27-Jul-16** | 17:53 | -0.79 | **-68.536** | **77.586** | **0** | **4.46** | **20.5** | - | - | **1278.0** | 1409.0 |
| **BFS-37** | **27-Jul-16** | 17:58 | -0.79 | **-68.531** | **77.581** | **0** | **4.54** | **20.8** | - | - | **1295.5** | 1429.8 |
| **BFS-38** | **27-Jul-16** | 18:02 | -0.79 | **-68.526** | **77.577** | **0** | **4.71** | **21.7** | - | - | **1351.3** | 1496.2 |
| **BFS-39** | **27-Jul-16** | 18:08 | -0.79 | **-68.520** | **77.571** | **0** | **4.30** | **22.0** | - | - | **1373.9** | 1499.4 |
| **BFS-40** | **27-Jul-16** | 18:13 | -0.79 | **-68.512** | **77.567** | **0** | **3.99** | **23.2** | - | - | **1440.3** | 1586.4 |
| **BFS-41** | **27-Jul-16** | 18:18 | -0.79 | **-68.502** | **77.562** | **0** | **3.87** | **23.4** | - | - | **1447.6** | 1614.7 |
| **BFS-42** | **27-Jul-16** | 18:23 | -0.79 | **-68.493** | **77.557** | **0** | **3.67** | **23.4** | - | - | **1443.1** | 1606.7 |
| **BFS-43** | **27-Jul-16** | 18:28 | -0.79 | **-68.487** | **77.552** | **0** | **4.03** | **24.0** | - | - | **1475.6** | 1645.2 |
| **BFS-44** | **27-Jul-16** | 18:33 | -0.36 | **-68.483** | **77.548** | **0** | **3.16** | **26.8** | - | - | **1627.7** | 1833.1 |
| **BFS-45** | **27-Jul-16** | 18:43 | -0.36 | **-68.478** | **77.539** | **0** | **3.49** | **27.0** | - | - | **1631.9** | 1827.8 |
| **BFS-46** | **27-Jul-16** | 18:53 | -0.36 | **-68.474** | **77.530** | **0** | **3.53** | **26.0** | - | - | **1584.2** | 1771.5 |
| **BFS-47** | **27-Jul-16** | 19:03 | -0.36 | **-68.481** | **77.521** | **0** | **3.53** | **25.6** | - | - | **1573.7** | 1760.0 |
| **BFS-48** | **27-Jul-16** | 19:18 | -0.36 | **-68.482** | **77.507** | **0** | **3.44** | **25.5** | - | - | **1561.5** | 1744.7 |
| **BFS-49** | **27-Jul-16** | 20:07 | 0.03 | **-68.491** | **77.472** | **0** | **5.46** | **30.5** | - | - | **1866.4** | 2084.2 |
| **CF-4** | **16-Jul-16** | 15:39 | -0.52 | **-68.601** | **77.681** | **0** | **0.00** | **32.6** | - | - | **2012.6** | 2149.0 |
| **P1** | **8-Jul-16** | 18:18 | 0.23 | **-68.601** | **77.676** | **0** | - | **31.6** | **-2.92** | **0.10** | **-** | - |
| **P2** | **10-Jul-16** | 12:07 | -0.95 | **-68.600** | **77.676** | **0** | - | **27.7** | **-5.79** | - | **-** | - |
| **P3** | **15-Jul-16** | 11:27 | -0.15 | **-68.602** | **77.677** | **0** | - | **33.0** | **-1.99** | **0.21** | **-** | - |
| **P4** | **16-Jul-16** | 15:39 | -0.52 | **-68.601** | **77.676** | **0** | - | **32.6** | **-2.12** | **0.12** | **2059.2** | - |
| **R1** | **7-Jul-16** | 16:42 | 0.17 | **-68.593** | **77.664** | **0** | - | **1.9** | **-21.40** | **0.02** | **111.8** | - |
| **R2** | **9-Jul-16** | 13:04 | -1.39 | **-68.596** | **77.660** | **0** | - | **3.0** | **-21.00** | **0.04** | **244.7** | - |
| **R3** | **15-Jul-16** | 17:47 | -1.07 | **-68.590** | **77.656** | **0** | - | **2.8** | **-9.73** | **0.52** | **216.9** | - |
| **S1** | **27-Jul-16** | 14:14 | -1.24 | **-68.606** | **77.671** | **0** | **5.01** | **14.2** | **-13.06** | **2.46** | **959.2** | - |
| **S2** | **27-Jul-16** | 14:19 | -1.24 | **-68.615** | **77.675** | **0** | **5.21** | **12.8** | **-14.24** | **0.75** | **875.7** | - |
| **S3** | **27-Jul-16** | 14:52 | -1.42 | **-68.632** | **77.675** | **0** | **4.96** | **12.5** | **-14.46** | **0.67** | **859.4** | - |
| **S4** | **27-Jul-16** | 14:57 | -1.42 | **-68.618** | **77.671** | **0** | **5.17** | **13.9** | **-13.28** | **2.21** | **925.9** | - |
| **S5** | **27-Jul-16** | 15:03 | -1.42 | **-68.603** | **77.668** | **0** | **5.44** | **15.3** | **-12.20** | **5.20** | **999.6** | - |
| **S6** | **27-Jul-16** | 15:08 | -1.42 | **-68.609** | **77.667** | **0** | **5.33** | **15.0** | **-12.37** | **7.76** | **990.3** | - |
| **S7** | **27-Jul-16** | 15:13 | -1.42 | **-68.623** | **77.670** | **0** | **5.11** | **14.3** | **-13.03** | **2.44** | **956.8** | - |
| **S8** | **27-Jul-16** | 15:18 | -1.42 | **-68.639** | **77.673** | **0** | **5.06** | **14.1** | **-13.15** | **2.57** | **938.8** | - |
| **S9** | **27-Jul-16** | 15:23 | -1.42 | **-68.652** | **77.676** | **0** | **5.18** | **10.9** | **-15.86** | **0.33** | **780.0** | - |
| **S10** | **27-Jul-16** | 15:27 | -1.42 | **-68.665** | **77.679** | **0** | **4.98** | **-** | **-14.95** | **0.77** | **830.7** | - |
| **S11** | **27-Jul-16** | 15:33 | -1.37 | **-68.681** | **77.682** | **0** | **5.17** | **13.9** | **-13.32** | **2.05** | **933.6** | - |
| **S12** | **27-Jul-16** | 15:38 | -1.37 | **-68.674** | **77.678** | **0** | **5.07** | **13.8** | **-13.34** | **2.08** | **921.2** | - |
| **S13** | **27-Jul-16** | 15:48 | -1.37 | **-68.666** | **77.672** | **0** | **4.72** | **13.4** | **-13.73** | **2.60** | **895.8** | - |
| **S14** | **27-Jul-16** | 15:53 | -1.37 | **-68.646** | **77.670** | **0** | **4.98** | **14.0** | **-13.25** | **2.89** | **934.0** | - |
| **S15** | **27-Jul-16** | 16:13 | -1.37 | **-68.636** | **77.660** | **0** | **5.17** | **15.4** | **-12.02** | **7.79** | **1013.4** | - |
| **S16** | **27-Jul-16** | 16:18 | -1.37 | **-68.641** | **77.656** | **0** | **4.76** | **17.1** | **-10.98** | **3.12** | **1110.6** | - |
| **S17** | **27-Jul-16** | 16:23 | -1.37 | **-68.636** | **77.651** | **0** | **4.72** | **18.9** | **-9.78** | **2.80** | **1210.3** | - |
| **S18** | **27-Jul-16** | 16:28 | -1.37 | **-68.631** | **77.647** | **0** | **4.68** | **-** | **-10.11** | **3.04** | **1187.5** | - |
| **S19** | **27-Jul-16** | 16:33 | -1.16 | **-68.628** | **77.643** | **0** | **4.80** | **18.2** | **-10.29** | **1.93** | **1162.0** | - |
| **S20** | **27-Jul-16** | 16:38 | -1.16 | **-68.622** | **77.639** | **0** | **4.91** | **18.4** | **-10.04** | **1.50** | **1178.1** | - |
| **S21** | **27-Jul-16** | 16:43 | -1.16 | **-68.616** | **77.635** | **0** | **4.89** | **18.5** | **-9.93** | **1.54** | **1189.6** | - |
| **S22** | **27-Jul-16** | 16:49 | -1.16 | **-68.607** | **77.630** | **0** | **4.88** | **19.6** | **-9.21** | **1.61** | **1251.5** | - |
| **S23** | **27-Jul-16** | 16:54 | -1.16 | **-68.601** | **77.626** | **0** | **4.62** | **20.4** | **-8.74** | **1.62** | **1294.9** | - |
| **S24** | **27-Jul-16** | 16:58 | -1.16 | **-68.594** | **77.622** | **0** | **4.53** | **20.7** | **-8.51** | **1.76** | **1313.3** | - |
| **S25** | **27-Jul-16** | 17:03 | -1.16 | **-68.588** | **77.617** | **0** | **4.47** | **20.7** | **-8.47** | **1.92** | **1316.6** | - |
| **S26** | **27-Jul-16** | 17:08 | -1.16 | **-68.582** | **77.613** | **0** | **4.42** | **-** | **-8.14** | **2.56** | **1342.6** | - |
| **S27** | **27-Jul-16** | 17:13 | -1.16 | **-68.574** | **77.609** | **0** | **4.25** | **21.3** | **-8.07** | **2.56** | **1345.9** | - |
| **S28** | **27-Jul-16** | 17:37 | -0.79 | **-68.561** | **77.600** | **0** | **4.36** | **20.8** | **-8.44** | **2.15** | **1322.4** | - |
| **S29** | **27-Jul-16** | 17:42 | -0.79 | **-68.551** | **77.595** | **0** | **4.27** | **20.3** | **-8.78** | **2.03** | **1290.0** | - |
| **S30** | **27-Jul-16** | 17:48 | -0.79 | **-68.543** | **77.590** | **0** | **4.19** | **20.7** | **-8.50** | **2.14** | **1310.9** | - |
| **S31** | **27-Jul-16** | 17:53 | -0.79 | **-68.536** | **77.586** | **0** | **4.46** | **20.5** | **-8.66** | **1.81** | **1295.6** | - |
| **S32** | **27-Jul-16** | 17:58 | -0.79 | **-68.531** | **77.581** | **0** | **4.54** | **20.8** | **-8.47** | **1.51** | **1313.7** | - |
| **S33** | **27-Jul-16** | 18:02 | -0.79 | **-68.526** | **77.577** | **0** | **4.71** | **21.7** | **-7.83** | **2.16** | **1371.3** | - |
| **S34** | **27-Jul-16** | 18:08 | -0.79 | **-68.520** | **77.571** | **0** | **4.30** | **22.0** | **-7.60** | **2.32** | **1394.5** | - |
| **S35** | **27-Jul-16** | 18:28 | -0.79 | **-68.487** | **77.552** | **0** | **4.03** | **24.0** | **-6.49** | **3.70** | **1499.9** | - |
| **S36** | **27-Jul-16** | 18:33 | -0.36 | **-68.483** | **77.548** | **0** | **3.16** | **26.8** | **-4.73** | **2.27** | **1658.0** | - |
| **S37** | **27-Jul-16** | 18:43 | -0.36 | **-68.478** | **77.539** | **0** | **3.49** | **27.0** | **-4.61** | **3.35** | **1662.5** | - |
| **S38** | **27-Jul-16** | 18:53 | -0.36 | **-68.475** | **77.530** | **0** | **3.53** | **26.0** | **-5.15** | **1.92** | **1612.7** | - |
| **S39** | **27-Jul-16** | 19:03 | -0.36 | **-68.481** | **77.521** | **0** | **3.53** | **-** | **-5.26** | **1.85** | **1601.6** | - |
| **S40** | **27-Jul-16** | 19:18 | -0.36 | **-68.482** | **77.507** | **0** | **3.44** | **25.5** | **-5.47** | **1.73** | **1589.1** | - |
| **S41** | **27-Jul-16** | 20:07 | 0.03 | **-68.491** | **77.472** | **0** | **5.46** | **30.5** | **-2.59** | **1.50** | **1906.4** | - |
| **SR1** | **27-Jul-16** | 14:28 | -1.24 | **-68.644** | **77.682** | **0** | **5.19** | **9.2** | **-17.33** | **0.29** | **692.4** | - |
| **SR2** | **27-Jul-16** | 14:33 | -1.24 | **-68.659** | **77.686** | **0** | **5.32** | **7.9** | **-18.35** | **0.12** | **631.5** | - |
| **SR3** | **27-Jul-16** | 14:38 | -1.42 | **-68.671** | **77.687** | **0** | **5.27** | **9.8** | **-16.93** | **0.15** | **724.9** | - |
| **SR4** | **27-Jul-16** | 14:42 | -1.42 | **-68.661** | **77.683** | **0** | **5.19** | **9.4** | **-17.16** | **0.14** | **707.9** | - |
| **SR5** | **27-Jul-16** | 14:47 | -1.42 | **-68.647** | **77.679** | **0** | **4.95** | **10.2** | **-16.48** | **0.22** | **743.1** | - |
| **SR6** | **27-Jul-16** | 18:13 | -0.79 | **-68.512** | **77.567** | **0** | **3.99** | **-** | **-7.03** | **3.17** | **1463.2** | - |
| **SR7** | **27-Jul-16** | 18:18 | -0.79 | **-68.502** | **77.562** | **0** | **3.87** | **23.4** | **-6.89** | **3.39** | **1470.8** | - |
| **SR8** | **27-Jul-16** | 18:23 | -0.79 | **-68.493** | **77.557** | **0** | **3.67** | **23.4** | **-6.96** | **3.65** | **1466.3** | - |
| **D2** | **29-Jul-16** | 17:26 | -1.34 | **-68.647** | **77.655** | **0** | **5.33** | **18.4** | **-10.42** | **0.39** | **1179.2** | - |
| **D3** | **29-Jul-16** | 16:23 | -1.17 | **-68.638** | **77.640** | **0** | **5.35** | **-** | **-11.37** | **0.21** | **1110.2** | - |
| **D4** | **29-Jul-16** | 14:53 | -1.34 | **-68.523** | **77.587** | **0** | **6.01** | **16.5** | **-11.69** | **0.28** | **1085.6** | - |
| **D5** | **29-Jul-16** | 14:16 | -0.54 | **-68.436** | **77.532** | **0** | **5.76** | **17.9** | **-10.64** | **0.52** | **1165.7** | - |
| **D6** | **29-Jul-16** | 21:01 | -0.38 | **-68.489** | **77.473** | **0** | **6.65** | **30.9** | **-2.25** | **0.86** | **-** | - |
| BF-1 | 24-Jul-17 | 15:44 | 0.41 | -68.650 | 77.670 | 0 | 5.0 | 18.9 | -8.23 | 0.57 | 1189.0 | 1290.4 |
| BF-2 | 24-Jul-17 | 17:59 | 0.09 | -68.659 | 77.646 | 0 | 5.0 | 22.2 | -4.67 | 1.55 | 1372.2 | 1500.7 |
| BF-3 | 24-Jul-17 | 17:59 | 0.09 | -68.590 | 77.621 | 0 | 5.0 | 17.9 | -4.04 | 1.01 | 1119.2 | 1202.2 |
| BF-5 | 24-Jul-17 | 21:56 | -1.56 | -68.493 | 77.573 | 0 | 5.0 | 17.4 | -8.66 | 2.43 | 1133.1 | 1192.6 |
| BF-6 | 1-Aug-17 | 14:25 | -0.60 | -68.464 | 77.547 | 0 | 5.0 | 23.6 | -4.34 | 0.87 | 1458.4 | 1599.7 |
| BF-7 | 1-Aug-17 | 12:50 | -0.38 | -68.468 | 77.522 | 0 | 5.0 | 24.4 | -4.07 | 0.50 | 1528.6 | 1646.5 |
| BF-8 | 1-Aug-17 | 10:28 | 0.03 | -68.469 | 77.495 | 0 | 5.0 | 25.0 | -3.97 | 0.71 | 1555.4 | 1689.8 |
| BF-9 | 1-Aug-17 | 8:37 | -0.01 | -68.465 | 77.468 | 0 | 5.0 | 27.2 | -3.07 | 0.22 | 1674.0 | 1836.3 |
| K-1 | 1-Aug-17 | 9:49 | 0.03 | -68.623 | 77.670 | 0 | 3.9 | 22.6 | -5.76 | 0.35 | 1419.8 | 1534.2 |
| K-2 | 1-Aug-17 | 11:56 | -0.18 | -68.651 | 77.682 | 0 | 3.1 | 18.6 | -9.45 | 0.41 | 1194.5 | 1271.3 |
| K-3 | 1-Aug-17 | 12:09 | -0.18 | -68.630 | 77.677 | 0 | 3.6 | 18.3 | -9.80 | 0.28 | 1185.2 | 1252.6 |
| K-4 | 1-Aug-17 | 12:20 | -0.18 | -68.612 | 77.673 | 0 | 4.8 | 22.2 | -6.06 | 0.43 | 1401.1 | 1509.0 |
| K-5 | 1-Aug-17 | 13:01 | -0.38 | -68.595 | 77.668 | 0 | 5.2 | 22.9 | -5.28 | 0.70 | 1436.2 | 1551.8 |
| K-7 | 1-Aug-17 | 13:35 | -0.60 | -68.694 | 77.676 | 0 | 4.3 | 20.6 | -7.45 | 0.52 | 1300.6 | 1407.0 |
| K-8 | 1-Aug-17 | 13:43 | -0.60 | -68.664 | 77.671 | 0 | 4.5 | 19.6 | -8.21 | 0.34 | 1257.2 | 1338.4 |
| K-9 | 1-Aug-17 | 13:47 | -0.60 | -68.657 | 77.677 | 0 | 4.4 | 17.6 | -10.22 | 0.28 | 1143.1 | 1207.3 |
| K-10 | 1-Aug-17 | 13:53 | -0.60 | -68.637 | 77.674 | 0 | 4.3 | 17.6 | -10.33 | 0.25 | 1150.1 | 1209.3 |
| K-11 | 1-Aug-17 | 13:59 | -0.60 | -68.620 | 77.664 | 0 | 4.1 | 20.8 | -7.46 | - | 1319.2 | 1415.7 |
| KT-1 | 1-Aug-17 | 15:05 | -0.80 | -68.652 | 77.658 | 0 | 4.5 | 17.3 | -10.24 | 0.46 | 1127.4 | 1185.1 |
| KT-2 | 1-Aug-17 | 15:14 | -0.80 | -68.631 | 77.635 | 0 | 5.0 | 19.9 | -7.74 | 0.74 | 1231.2 | 1361.6 |
| KT-3 | 1-Aug-17 | 15:22 | -0.80 | -68.567 | 77.611 | 0 | 5.2 | 20.5 | -7.16 | 0.82 | 1303.8 | 1401.7 |
| KT-4 | 1-Aug-17 | 15:33 | -0.93 | -68.512 | 77.585 | 0 | 5.3 | 21.8 | -6.17 | 1.05 | 1377.8 | 1483.7 |
| KT-5 | 1-Aug-17 | 15:42 | -0.93 | -68.475 | 77.560 | 0 | 5.4 | 23.6 | -4.83 | 1.00 | 1484.2 | 1598.6 |
| KT-6 | 1-Aug-17 | 16:11 | -0.93 | -68.463 | 77.534 | 0 | 5.3 | 24.3 | -4.39 | 1.05 | 1524.1 | 1646.3 |
| BF-9 | 1-Aug-17 | 8:37 | -0.14 | -68.465 | 77.468 | 300 | - | 34.3 | -0.012 | 0.03 | 2183.3 | 2275.6 |
